# Supplementary material for: Melatonin prevents senescence of canine adipose-derived mesenchymal stem cells through activating NRF2 and inhibiting ER stress
Source: publisher site journal article supplement (doi:10.18632/aging.101602), 2018-10-25
Supplement: Supplementary file [file aging-v10i10-101602-supplementary-material-SD1.pdf]

SUPPLEMENTARY FIGURE

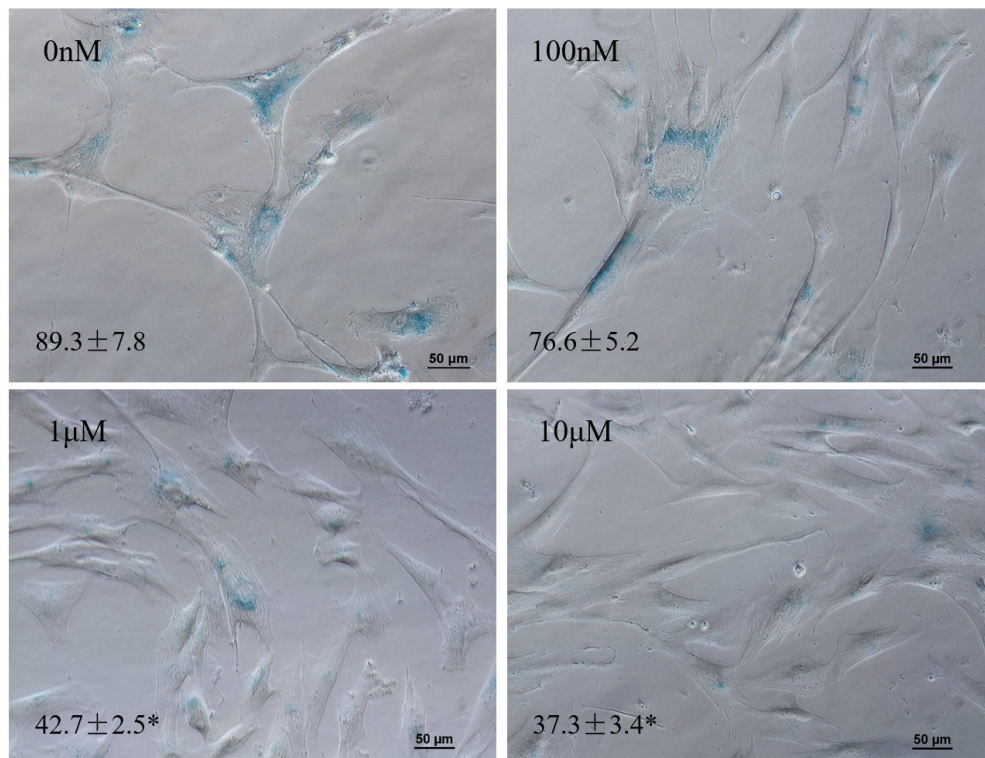

**Supplementary Figure 1.** The positive rate of SA-b-gal staining on P11 cADMSCs treated with different concentrations of melatonin. Bar = 50 µm.
